# Supplementary material
Source: Springer Nature journal article supplement (https://www.springermedizin.de/resource/supplementary/13041_2014_287_MOESM1_ESM.pdf/25657910)

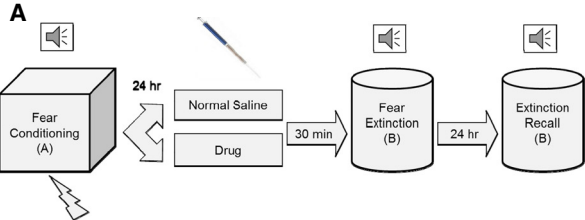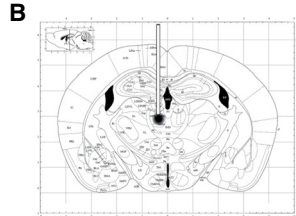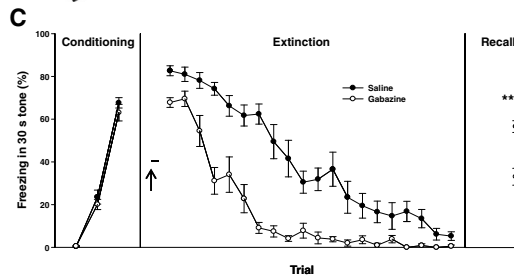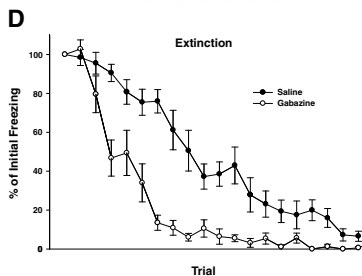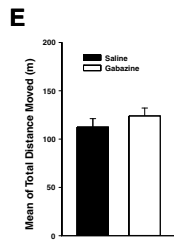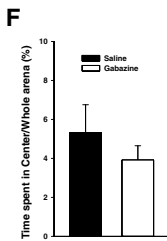

Supplement: MOESM1 [file 25657910]
